# Supplementary material for: The potential of Smartstone probes in landslide experiments: how to read motion data
Source: Copernicus journal article supplement (doi:10.5194/nhess-20-3501-2020), 2020-12-17
Supplement: Supplementary file 1 [file nhess-20-3501-2020-supplement.zip]

Archive with 3 entries (2 files):
- nhess-20-3501-2020-supplement-title-page.pdf
- nhess-2020-61_suppl/
- nhess-2020-61_suppl/nhess-2020-61_Video1.mp4
