# Supplementary material for: The potential of Smartstone probes in landslide experiments: how to read motion data
Source: Copernicus journal article supplement (doi:10.5194/nhess-20-3501-2020), 2020-12-17
Supplement: Supplementary file 1 [file nhess-20-3501-2020-supplement.zip › nhess-20-3501-2020-supplement-title-page.pdf]

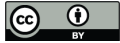

## *Supplement of*

# **The potential of Smartstone probes in landslide experiments: how to read motion data**

**J. Bastian Dost et al.**

*Correspondence to:* J. Bastian Dost ([s6jodost@uni-trier.de](mailto:s6jodost@uni-trier.de))

- [nhess-20-3501-2020-supplement-title-page.pdf](#)
- [nhess-2020-61\\_suppl](#)
  - [nhess-2020-61\\_Video1.mp4](#)

The copyright of individual parts of the supplement might differ from the CC BY 4.0 License.
